# Supplementary material
Source: publisher figshare collection journal article supplement (https://acs.figshare.com/ndownloader/files/4128022)
Supplement: Supplementary file 1 [file 4128022]

Supporting information

# Growth Kinetics of Needle-like Silicon Wires Formed via the Zinc Reduction Reaction of Silicon Tetrachloride

*Kohei Yamaguchi, Susumu Inasawa\* and Yukio Yamaguchi.*

Department of Chemical System Engineering, Graduate School of Engineering,

The University of Tokyo, 7-3-1 Hongo, Bunkyo-ku, Tokyo 113-8656, Japan.

Tel/Fax: +81-3-5841-7309

\* inasawa@chemsys.t.u-tokyo.ac.jp

Caption for supporting information

Movie S1. Movie file of the real-time observation of needle-like silicon wires shown in Figure 2a-f. One second in the movie corresponds to 10 seconds in the observation.
